# Supplementary material
Source: PubMed Central journal article supplement (PMC2538949)
Supplement: NIHMS64845-supplement-1_s.pdf [file NIHMS64845-supplement-1_s.pdf]

## Elemental Analyses

| Compd | Formula                                                                                       | Calcd, % |      |       |       | Found % |      |       |       |
|-------|-----------------------------------------------------------------------------------------------|----------|------|-------|-------|---------|------|-------|-------|
|       |                                                                                               | C        | H    | N     | Cl    | C       | H    | N     | Cl    |
| 5     | C <sub>22</sub> H <sub>25</sub> N <sub>5</sub> O <sub>6</sub> · 1.4 H <sub>2</sub> O          | 54.97    | 5.83 | 14.57 |       | 55.13   | 5.77 | 14.36 |       |
| 6     | C <sub>21</sub> H <sub>23</sub> N <sub>5</sub> O <sub>6</sub> · 1.0 HCl · 0.6H <sub>2</sub> O | 52.78    | 5.06 | 14.65 | 7.05  | 52.65   | 5.23 | 14.40 | 6.85  |
| 9     | C <sub>13</sub> H <sub>14</sub> O <sub>4</sub>                                                | 66.66    | 6.02 |       |       | 66.40   | 6.13 |       |       |
| 10    | C <sub>13</sub> H <sub>16</sub> O <sub>4</sub>                                                | 66.09    | 6.83 |       |       | 66.22   | 6.66 |       |       |
| 12    | C <sub>14</sub> H <sub>17</sub> O <sub>3</sub> Cl                                             | 62.57    | 6.38 |       | 13.19 | 62.34   | 6.34 |       | 13.46 |
| 14    | C <sub>18</sub> H <sub>20</sub> N <sub>4</sub> O <sub>3</sub>                                 | 63.52    | 5.92 | 16.46 |       | 63.77   | 5.94 | 16.44 |       |
| 15    | C <sub>18</sub> H <sub>20</sub> N <sub>4</sub> O <sub>3</sub> · 0.1 H <sub>2</sub> O          | 63.18    | 5.95 | 16.37 |       | 63.10   | 5.96 | 16.40 |       |
| 16    | C <sub>17</sub> H <sub>18</sub> N <sub>4</sub> O <sub>3</sub> · 1.0 HCl · 0.6 MeOH            | 54.54    | 5.58 | 14.15 |       | 54.63   | 5.25 | 14.20 |       |
| 21    | C <sub>17</sub> H <sub>18</sub> N <sub>4</sub> O <sub>3</sub> · 1.0 HCl                       | 56.28    | 5.28 | 15.44 |       | 55.99   | 5.32 | 15.40 |       |
| 22    | C <sub>26</sub> H <sub>33</sub> N <sub>5</sub> O <sub>6</sub>                                 | 61.04    | 6.50 | 13.69 |       | 60.95   | 6.56 | 13.52 |       |
